# Supplementary material
Source: publisher figshare collection journal article supplement (https://gsapubs.figshare.com/ndownloader/files/22758131)
Supplement: Supplementary file 1 [file 22758131]

## DATA REPOSITORY

### Additional explanation of analytical methods

Zircon was mounted in epoxy, polished, and imaged for cathodoluminescence (CL) with an accelerating voltage of 15 KeV and beam current of 10 nA on a JEOL 733 Superprobe electron microprobe (EMP) with the secondary electron detector mounted in place of the optical microscope ocular. The grains were also imaged with backscattered electrons (BSE) at similar settings on the EMP. Zr, Si, Hf, Th, and U were measured with the EMP at a beam current of 200 nA. Natural and synthetic standards were used. Measurement times on peak were 240 seconds on Th, 120 seconds on Zr, Hf, and U, and 16 seconds on Si. Measurement times on background were the same, split between both sides of the peak. Background positions were carefully chosen to avoid secondary peak interferences and the detectors were optimally set for pulse-height analysis. Raw data were corrected for matrix effects with the CITZAF program (Armstrong, 1995). The  $1\sigma$  standard deviations of counts were 0.3% for Si, 1.0% for Zr, 0.5% for Hf, 1-4% for Th-rich domains, 5-15% for Th-poor domains, 2-3% for U-rich domains, and 5-20% for U-poor domains.

Armstrong, J.T., 1995, CITZAF—a package of correction programs for the quantitative electron microbeam X-ray analysis of thick polished materials, thin-films and particles: *Microbeam Analysis*, v. 4, p. 177–200.

### Error propagation for the initial Th/U disequilibrium correction

The theoretical background for initial  $^{230}\text{Th}/^{238}\text{U}$  disequilibrium and methodology for correcting  $^{206}\text{Pb}/^{238}\text{U}$  dates is given in Schärer (1984) and Parrish (1990). Because  $^{206}\text{Pb}/^{238}\text{U}$  dates in young zircon are especially sensitive to these corrections and the uncertainties have not been formally treated in the literature, we derived the error propagation for the Th/U disequilibrium correction and that of the Th/U[zircon] calculation. Schärer (1984) showed that the disequilibrium corrected  $^{206}\text{Pb}/^{238}\text{U}$  ( $R68dc$ ) can be related to the measured  $^{206}\text{Pb}/^{238}\text{U}$  ( $R68o$ ), the ratio of the Th/U[zircon] ( $TUz$ ) and the Th/U[magma] ( $TUm$ ), and the ratio of the decay constants of  $^{238}\text{U}$  and  $^{230}\text{Th}$  ( $\lambda_{238}$  and  $\lambda_{230}$ , respectively) in the equation:

$$R68dc = R68o - \left[ \left( \frac{\lambda_{238}}{\lambda_{230}} \right) \cdot \left( \frac{TUz}{TUm} - 1 \right) \right]$$

The uncertainty in the corrected ratio can be calculated using standard error propagation techniques related to the partial derivatives of the expression relative to the corrected ratio and assuming a Gaussian distribution of errors.

$$\sigma_{R68dc}^2 = \sigma_{R68o}^2 \cdot \left( \frac{\partial R68dc}{\partial R68o} \right)^2 + \sigma_{\lambda_{238}}^2 \cdot \left( \frac{\partial R68dc}{\partial \lambda_{238}} \right)^2 + \sigma_{\lambda_{230}}^2 \cdot \left( \frac{\partial R68dc}{\partial \lambda_{230}} \right)^2 + \sigma_{TUz}^2 \cdot \left( \frac{\partial R68dc}{\partial TUz} \right)^2 + \sigma_{TUm}^2 \cdot \left( \frac{\partial R68dc}{\partial TUm} \right)^2$$

where  $\sigma$  denotes the uncertainty in the variable in its subscript. It is a good assumption in this case that none of these errors are correlated, so those terms are excluded. The uncertainties in  $\lambda_{238}$  and  $\lambda_{230}$  are treated as systematic errors and not propagated into individual zircon analyses.

The derivatives are:

$$\begin{aligned}
\left(\frac{\partial R68dc}{\partial R68o}\right) &= 1 \\
\left(\frac{\partial R68dc}{\partial \lambda_{238}}\right) &= \frac{1}{\lambda_{230}} \cdot \left(1 - \frac{TUz}{TUm}\right) \\
\left(\frac{\partial R68dc}{\partial \lambda_{230}}\right) &= \frac{\lambda_{238}}{\lambda_{230}^2} \cdot \left(\frac{TUz}{TUm} - 1\right) \\
\left(\frac{\partial R68dc}{\partial TUz}\right) &= -\left(\frac{\lambda_{238}}{\lambda_{230}} \cdot \left(\frac{1}{TUm}\right)\right) \\
\left(\frac{\partial R68dc}{\partial TUm}\right) &= \left(\frac{\lambda_{238}}{\lambda_{230}} \cdot \left(\frac{TUz}{TUm^2}\right)\right)
\end{aligned}$$

The Th/U[magma] is estimated (in this case) from melt inclusions in quartz phenocrysts from the Bishop Tuff (Anderson et al., 2000) and the Th/U[zircon] is calculated as follows. The amount of  $^{232}\text{Th}$  in the zircon is estimated by calculating the amount (in moles) of radiogenic  $^{208}\text{Pb}$  (*Pb208r*) in the zircon using algorithms identical in derivation to those presented for *Pb206r* and *Pb207r* in Schmitz and Schoene (in press) and assuming concordance with the  $^{206}\text{Pb}/^{238}\text{U}$  date:

$$Th232 = \frac{Pb208r}{[\exp(\text{age} \cdot \lambda_{232}) - 1]},$$

where *Th232* is the amount (in moles) of  $^{232}\text{Th}$  in the zircon, *age* is the  $^{206}\text{Pb}/^{238}\text{U}$  date, and  $\lambda_{232}$  is the decay constant for  $^{232}\text{Th}$ . The uncertainty in the amount of  $^{232}\text{Th}$ , assuming no correlations between errors, is:

$$\sigma_{Th232}^2 = \left[ \sigma_{Pb208r} \left( \frac{\partial Th232}{\partial Pb208r} \right) \right]^2 + \left[ \sigma_{age} \left( \frac{\partial Th232}{\partial age} \right) \right]^2 + \left[ \sigma_{\lambda_{232}} \left( \frac{\partial Th232}{\partial \lambda_{232}} \right) \right]^2$$

The uncertainty in  $\lambda_{232}$  is a systematic error and not propagated into individual zircons. The partial derivatives are:

$$\begin{aligned}
\left(\frac{\partial Th232}{\partial Pb208r}\right) &= \frac{1}{[\exp(\text{age} \cdot \lambda_{232}) - 1]} \\
\left(\frac{\partial Th232}{\partial age}\right) &= \frac{-Pb208r}{[\exp(\text{age} \cdot \lambda_{232}) - 1]^2} \cdot \exp(\text{age} \cdot \lambda_{232}) \cdot \lambda_{232} \\
\left(\frac{\partial Th232}{\partial \lambda_{232}}\right) &= \frac{-Pb208r}{[\exp(\text{age} \cdot \lambda_{232}) - 1]^2} \cdot \exp(\text{age} \cdot \lambda_{232}) \cdot \text{age}
\end{aligned}$$

The uncertainty in the Th/U[zircon] is calculated by propagating the uncertainties in the calculated amounts of  $^{232}\text{Th}$  and U (again assuming errors are uncorrelated):

$$\sigma_{TUz} = TUz \cdot \sqrt{\left(\frac{\sigma_{Th232}}{Th232}\right)^2 + \left(\frac{\sigma_U}{U}\right)^2}$$

We note that this is the present day Th/U[zircon], but because of the young age of the Bishop Tuff, this number has not changed substantially since the time of eruption. In old samples, the Th/U[zircon] and Th/U[magma] at the time of crystallization will be different from that calculated above, and may need to be corrected for radioactive decay for maximum accuracy.

Because the Th/U[zircon] is calculated using the  $^{206}\text{Pb}/^{238}\text{U}$  date, which is turn used to recalculate this date, a few iterations are necessary to converge.

**Table 1. U-Pb isotopic data from the Bishop Tuff.**

| Isotopic ratios      |                 |                 |     |      |                   |                     |                     |                   |                   |           |                   |                   |       |         |                   |                   | Dates             |                  |       |                  |     |                   |   |
|----------------------|-----------------|-----------------|-----|------|-------------------|---------------------|---------------------|-------------------|-------------------|-----------|-------------------|-------------------|-------|---------|-------------------|-------------------|-------------------|------------------|-------|------------------|-----|-------------------|---|
| Sample               | Pb <sub>c</sub> | Pb*             | Th  | ±    | <sup>206</sup> Pb |                     |                     | <sup>208</sup> Pb | <sup>206</sup> Pb | % err     | <sup>207</sup> Pb | <sup>207</sup> Pb | % err | corr.   | <sup>206</sup> Pb | <sup>207</sup> Pb | <sup>207</sup> Pb |                  |       |                  |     |                   |   |
|                      | Pb*             | Pb <sub>c</sub> | U   |      | <sup>204</sup> Pb | % <sup>206</sup> Pb | % <sup>207</sup> Pb | <sup>206</sup> Pb | <sup>238</sup> U  |           | <sup>235</sup> U  | % err             |       |         | <sup>206</sup> Pb | % err             | coef.             | <sup>238</sup> U | ±     | <sup>235</sup> U | ±   | <sup>206</sup> Pb | ± |
| (a)                  | (b)             | (c)             | (d) | (e)  | (f)               | (g)                 | (h)                 | (i)               | (j)               | (j)       | (k)               | (j)               | (k)   | (j)     | (k)               | (l)               | (m)               | (l)              | (m)   | (n)              | (o) |                   |   |
| z2 ET, CA            | 1.70            | 0.37            | 4.6 | 0.52 | 0.01              | 291                 | 93.7                | 49.5              | 0.197             | 0.0001190 | 0.36              | 0.0008138         | 2.55  | 0.05609 | 2.39              | 0.888             | 766.8             | 2.8              | 826.0 | 21.1             | 456 | 53                |   |
| z3 ET, CA            | 2.29            | 0.42            | 5.5 | 0.58 | 0.01              | 337                 | 94.6                | 53.2              | 0.215             | 0.0001189 | 0.37              | 0.0008084         | 1.65  | 0.05556 | 1.55              | 0.795             | 766.6             | 2.8              | 820.5 | 13.5             | 435 | 35                |   |
| z7 ET, CA            | 2.13            | 0.31            | 6.8 | 0.57 | 0.01              | 414                 | 95.6                | 58.7              | 0.213             | 0.0001186 | 0.37              | 0.0008135         | 1.36  | 0.05610 | 1.28              | 0.687             | 764.7             | 2.8              | 825.7 | 11.2             | 456 | 28                |   |
| z10 ET, CA           | 1.98            | 0.46            | 4.3 | 0.60 | 0.01              | 266                 | 93.1                | 46.8              | 0.225             | 0.0001187 | 0.39              | 0.0008037         | 2.56  | 0.05529 | 2.45              | 0.707             | 765.2             | 3.0              | 815.7 | 20.9             | 424 | 55                |   |
| z11 ET, CA           | 1.54            | 0.74            | 2.1 | 0.57 | 0.01              | 140                 | 86.9                | 30.3              | 0.217             | 0.0001194 | 0.40              | 0.0008147         | 6.91  | 0.05578 | 6.84              | 0.372             | 769.5             | 3.1              | 826.9 | 57.1             | 443 | 152               |   |
| z12 ET, CA           | 1.84            | 0.37            | 5.0 | 0.55 | 0.02              | 311                 | 94.1                | 50.4              | 0.208             | 0.0001193 | 0.40              | 0.0007890         | 3.88  | 0.05413 | 3.69              | 0.804             | 768.9             | 3.1              | 800.8 | 31.0             | 376 | 83                |   |
| z14 ET               | 1.63            | 0.33            | 4.9 | 0.56 | 0.01              | 304                 | 94.0                | 50.5              | 0.211             | 0.0001186 | 0.37              | 0.0008071         | 2.18  | 0.05567 | 2.05              | 0.859             | 764.7             | 2.9              | 819.2 | 17.8             | 439 | 46                |   |
| z15 ET               | 1.77            | 0.88            | 2.0 | 0.61 | 0.01              | 133                 | 86.3                | 29.4              | 0.230             | 0.0001191 | 0.41              | 0.0008242         | 3.48  | 0.05642 | 3.34              | 0.741             | 767.9             | 3.2              | 836.5 | 29.1             | 469 | 74                |   |
| z16 ET               | 1.88            | 0.87            | 2.2 | 0.59 | 0.01              | 143                 | 87.3                | 30.8              | 0.219             | 0.0001186 | 0.40              | 0.0008060         | 3.09  | 0.05553 | 2.94              | 0.795             | 764.6             | 3.0              | 818.1 | 25.3             | 434 | 65                |   |
| z18 ET               | 1.66            | 0.69            | 2.4 | 0.58 | 0.01              | 158                 | 88.4                | 33.4              | 0.220             | 0.0001189 | 0.41              | 0.0008121         | 3.60  | 0.05582 | 3.44              | 0.773             | 766.3             | 3.1              | 824.2 | 29.7             | 445 | 77                |   |
| z19 IMG, MIT, CA     | 1.73            | 0.44            | 4.0 | 0.52 | 0.01              | 252                 | 92.8                | 45.5              | 0.201             | 0.0001191 | 0.36              | 0.0008058         | 1.90  | 0.05549 | 1.77              | 0.780             | 767.5             | 2.7              | 817.8 | 15.6             | 432 | 40                |   |
| z21 IMG, CD, MIT, CA | 2.30            | 0.37            | 6.2 | 0.54 | 0.01              | 381                 | 95.2                | 56.1              | 0.202             | 0.0001194 | 0.36              | 0.0008003         | 1.19  | 0.05488 | 1.11              | 0.584             | 769.7             | 2.8              | 812.3 | 9.7              | 407 | 25                |   |
| z22 IMG, CD, MIT, CA | 1.44            | 0.94            | 1.5 | 0.51 | 0.02              | 109                 | 83.2                | 24.4              | 0.197             | 0.0001192 | 0.43              | 0.0008061         | 3.87  | 0.05546 | 3.63              | 0.788             | 768.5             | 3.3              | 818.2 | 31.7             | 431 | 81                |   |
| z23 IMG, CD, MIT, CA | 1.81            | 0.36            | 5.1 | 0.55 | 0.01              | 315                 | 94.2                | 51.3              | 0.208             | 0.0001190 | 0.41              | 0.0008059         | 1.45  | 0.05545 | 1.35              | 0.474             | 766.9             | 3.1              | 818.0 | 11.9             | 430 | 30                |   |
| z24 IMG, ET, CA      | 0.87            | 0.41            | 2.1 | 0.45 | 0.02              | 146                 | 87.5                | 31.5              | 0.180             | 0.0001209 | 0.45              | 0.0008269         | 7.98  | 0.05619 | 7.72              | 0.680             | 779.4             | 3.5              | 839.2 | 66.9             | 460 | 171               |   |
| z25 IMG, ET, CA      | 0.97            | 0.64            | 1.5 | 0.47 | 0.02              | 110                 | 83.4                | 24.8              | 0.186             | 0.0001189 | 0.40              | 0.0008146         | 5.75  | 0.05633 | 5.54              | 0.711             | 766.7             | 3.1              | 826.8 | 47.5             | 465 | 123               |   |
| z26 IMG, ET, CA      | 1.39            | 0.51            | 2.7 | 0.58 | 0.01              | 176                 | 89.6                | 36.3              | 0.219             | 0.0001193 | 0.41              | 0.0008198         | 3.90  | 0.05616 | 3.78              | 0.546             | 768.9             | 3.2              | 832.1 | 32.5             | 459 | 84                |   |
| z27 IMG, CD, ET, CA  | 1.72            | 0.66            | 2.6 | 0.59 | 0.01              | 169                 | 89.2                | 34.6              | 0.221             | 0.0001191 | 0.41              | 0.0008008         | 2.94  | 0.05493 | 2.78              | 0.788             | 767.5             | 3.1              | 812.8 | 23.9             | 409 | 62                |   |
| z28 IMG, CD, ET, CA  | 1.57            | 0.43            | 3.6 | 0.57 | 0.01              | 229                 | 92.0                | 42.7              | 0.213             | 0.0001199 | 0.37              | 0.0008092         | 2.14  | 0.05515 | 2.02              | 0.835             | 772.7             | 2.9              | 821.3 | 17.6             | 418 | 45                |   |

(a) z2, z3 etc. are labels for fractions; IMG = grain was CL and BSE imaged; CD = central domain seen in CL image; ET = EARTHTIME tracer solution; MIT = MIT tracer solution;

CA = grain was treated with the chemical abrasion method.

(b) Weight of radiogenic Pb.

(c) Weight of common Pb.

(d) Ratio of radiogenic Pb to common Pb.

(e) Model Th/U ratio calculated from radiogenic <sup>208</sup>Pb/<sup>206</sup>Pb ratio and <sup>206</sup>Pb/<sup>238</sup>U date corrected for initial disequilibrium in Th/U.

(f) Error is 2 sigma.

(g) Measured ratio corrected for spike and fractionation only. Fractionation correction of  $0.25 \pm 0.04\%$ /amu (atomic mass unit) was applied to Daly analyses performed on the Sector-54 mass spectrometer, based on analysis of NBS-981.

(h) % of <sup>206</sup>Pb that is radiogenic Pb.

(i) % of <sup>207</sup>Pb that is radiogenic Pb.

(j) Corrected for fractionation, spike, and procedural blank. All common Pb is assigned to procedural blank. Measured procedural blank composition is <sup>206</sup>Pb/<sup>204</sup>Pb =  $18.27 \pm 0.18$ , <sup>207</sup>Pb/<sup>204</sup>Pb =  $15.59 \pm 0.16$ , <sup>208</sup>Pb/<sup>204</sup>Pb =  $38.12 \pm 0.38$  (2 sigma). <sup>206</sup>Pb/<sup>238</sup>U and <sup>208</sup>Pb/<sup>206</sup>Pb ratios corrected for initial disequilibrium in Th/U using Th/U [magma] =  $2.81 \pm 0.32$  (2 sigma).

(k) Error is 2 sigma, propagated using the algorithms of Schmitz and Schoene (in press). <sup>206</sup>Pb/<sup>238</sup>U error includes uncertainty associated with initial disequilibrium in Th/U.

(l) Date in Ka based on decay constants of Jaffey et al. (1971). <sup>206</sup>Pb/<sup>238</sup>U date corrected for initial disequilibrium in Th/U using Th/U [magma] =  $2.81 \pm 0.32$  (2 sigma).

(m) Error in Ka is 2 sigma. <sup>206</sup>Pb/<sup>238</sup>U error includes uncertainty associated with initial disequilibrium in Th/U.

(n) Date in Ma based on decay constants of Jaffey et al. (1971).

(o) Error in Ma is 2 sigma.

**Table 2. Chemical compositions of zircon from the Bishop Tuff.****z20**

| <b>Electron microprobe results (wt. %)</b> |       |       |       |       |       |       |       |
|--------------------------------------------|-------|-------|-------|-------|-------|-------|-------|
| <b>Position<sup>1</sup></b>                | ED    | ED    | ED    | ED    | CD    | CD    | CD    |
| <b>Si</b>                                  | 15.34 | 15.33 | 15.33 | 15.31 | 15.30 | 15.30 | 15.30 |
| <b>Zr</b>                                  | 48.22 | 48.19 | 48.18 | 48.19 | 48.20 | 48.21 | 48.20 |
| <b>Hf</b>                                  | 1.23  | 1.14  | 1.13  | 1.06  | 1.02  | 1.03  | 1.03  |
| <b>U</b>                                   | 0.24  | 0.30  | 0.37  | 0.25  | 0.16  | 0.14  | 0.16  |
| <b>Th</b>                                  | 0.09  | 0.21  | 0.24  | 0.15  | 0.08  | 0.05  | 0.08  |
| <b>O</b>                                   | 34.61 | 34.58 | 34.58 | 34.54 | 34.53 | 34.53 | 34.53 |
| <b>Total</b>                               | 99.73 | 99.76 | 99.83 | 99.51 | 99.29 | 99.25 | 99.30 |
| <b>Th/U</b>                                | 0.38  | 0.69  | 0.64  | 0.60  | 0.47  | 0.37  | 0.50  |

**Grain 4**

| <b>Electron microprobe results (wt. %)</b> |       |       |       |       |       |       |       |       |
|--------------------------------------------|-------|-------|-------|-------|-------|-------|-------|-------|
| <b>Position<sup>1</sup></b>                | ED    | ED    | ED    | ED    | CD    | CD    | CD    | CD    |
| <b>Si</b>                                  | 15.34 | 15.34 | 15.32 | 15.33 | 15.31 | 15.30 | 15.30 | 15.30 |
| <b>Zr</b>                                  | 48.20 | 48.18 | 48.20 | 48.19 | 48.22 | 48.22 | 48.21 | 48.22 |
| <b>Hf</b>                                  | 1.19  | 1.15  | 1.11  | 1.12  | 1.09  | 1.05  | 1.05  | 1.04  |
| <b>U</b>                                   | 0.31  | 0.39  | 0.23  | 0.29  | 0.10  | 0.07  | 0.10  | 0.07  |
| <b>Th</b>                                  | 0.14  | 0.31  | 0.11  | 0.21  | 0.05  | 0.04  | 0.04  | 0.03  |
| <b>O</b>                                   | 34.60 | 34.58 | 34.56 | 34.57 | 34.55 | 34.54 | 34.54 | 34.53 |
| <b>Total</b>                               | 99.78 | 99.94 | 99.53 | 99.71 | 99.32 | 99.22 | 99.24 | 99.20 |
| <b>Th/U</b>                                | 0.45  | 0.80  | 0.49  | 0.74  | 0.53  | 0.53  | 0.41  | 0.43  |

**z22**

| <b>Electron microprobe results (wt. %)</b> |       |        |        |       |       |       |       |       |       |       |
|--------------------------------------------|-------|--------|--------|-------|-------|-------|-------|-------|-------|-------|
| <b>Position<sup>1</sup></b>                | ED    | ED     | ED     | ED    | ED    | ED    | ED    | CD    | CD    | CD    |
| <b>Si</b>                                  | 15.34 | 15.34  | 15.35  | 15.33 | 15.32 | 15.31 | 15.31 | 15.28 | 15.28 | 15.28 |
| <b>Zr</b>                                  | 48.19 | 48.17  | 48.15  | 48.20 | 48.20 | 48.17 | 48.17 | 48.20 | 48.20 | 48.20 |
| <b>Hf</b>                                  | 1.15  | 1.16   | 1.14   | 1.13  | 1.09  | 0.99  | 1.01  | 0.93  | 0.93  | 0.91  |
| <b>U</b>                                   | 0.40  | 0.45   | 0.53   | 0.27  | 0.25  | 0.32  | 0.31  | 0.07  | 0.08  | 0.04  |
| <b>Th</b>                                  | 0.19  | 0.37   | 0.45   | 0.13  | 0.12  | 0.29  | 0.30  | 0.03  | 0.03  | 0.01  |
| <b>O</b>                                   | 34.58 | 34.59  | 34.58  | 34.57 | 34.55 | 34.52 | 34.52 | 34.49 | 34.49 | 34.48 |
| <b>Total</b>                               | 99.85 | 100.08 | 100.19 | 99.63 | 99.53 | 99.60 | 99.63 | 99.00 | 99.01 | 98.92 |
| <b>Th/U</b>                                | 0.47  | 0.82   | 0.85   | 0.49  | 0.49  | 0.92  | 0.96  | 0.51  | 0.37  | 0.20  |

**z28**

| <b>Electron microprobe results (wt. %)</b> |       |       |       |       |       |       |       |       |       |
|--------------------------------------------|-------|-------|-------|-------|-------|-------|-------|-------|-------|
| <b>Position<sup>1</sup></b>                | ED    | ED    | ED    | ED    | ED    | ED    | CD    | CD    | CD    |
| <b>Si</b>                                  | 15.35 | 15.34 | 15.33 | 15.33 | 15.33 | 15.33 | 15.31 | 15.31 | 15.31 |
| <b>Zr</b>                                  | 48.18 | 48.20 | 48.19 | 48.18 | 48.17 | 48.18 | 48.20 | 48.20 | 48.20 |
| <b>Hf</b>                                  | 1.20  | 1.17  | 1.13  | 1.12  | 1.11  | 1.12  | 1.05  | 1.04  | 1.05  |
| <b>U</b>                                   | 0.43  | 0.35  | 0.37  | 0.35  | 0.39  | 0.34  | 0.17  | 0.19  | 0.18  |
| <b>Th</b>                                  | 0.27  | 0.16  | 0.22  | 0.24  | 0.30  | 0.23  | 0.08  | 0.08  | 0.07  |
| <b>O</b>                                   | 34.60 | 34.59 | 34.57 | 34.57 | 34.56 | 34.57 | 34.54 | 34.53 | 34.54 |

|              |        |       |       |       |       |       |       |       |       |
|--------------|--------|-------|-------|-------|-------|-------|-------|-------|-------|
| <b>Total</b> | 100.03 | 99.81 | 99.81 | 99.79 | 99.87 | 99.78 | 99.33 | 99.35 | 99.35 |
| <b>Th/U</b>  | 0.62   | 0.47  | 0.61  | 0.69  | 0.78  | 0.68  | 0.47  | 0.41  | 0.39  |

<sup>1</sup> CD = central domain, ED = external domain.
